# Supplementary material
Source: Springer Nature journal article supplement (https://www.springermedizin.de/resource/supplementary/12958_2010_680_MOESM9_ESM.pdf/9568580)

(i)

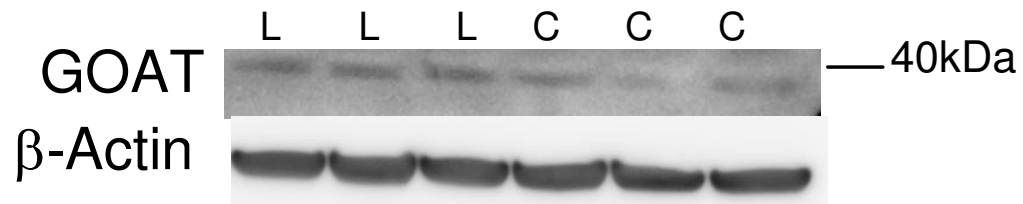

(ii)

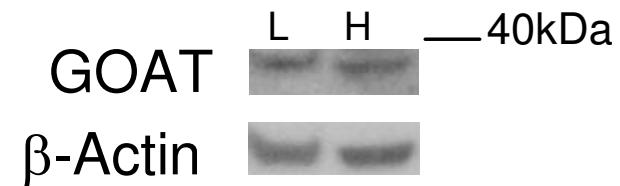

(iii)

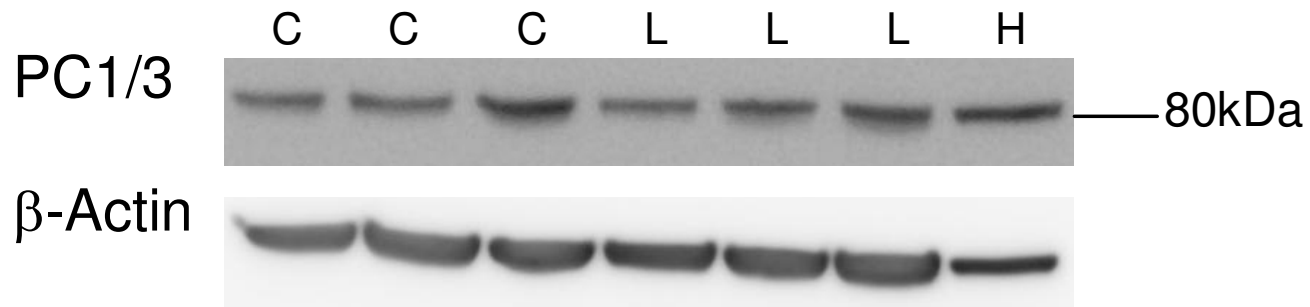

Supplement: MOESM9 [file 9568580]
